# Supplementary material for: Assessing the spatial variability of coefficients of landslide predictors in different regions of Romania using logistic regression
Source: Copernicus journal article supplement (doi:10.5194/nhess-13-3339-2013), 2013-12-19
Supplement: Supplementary file 1 [file nhess-13-3339-2013-supplement.pdf]

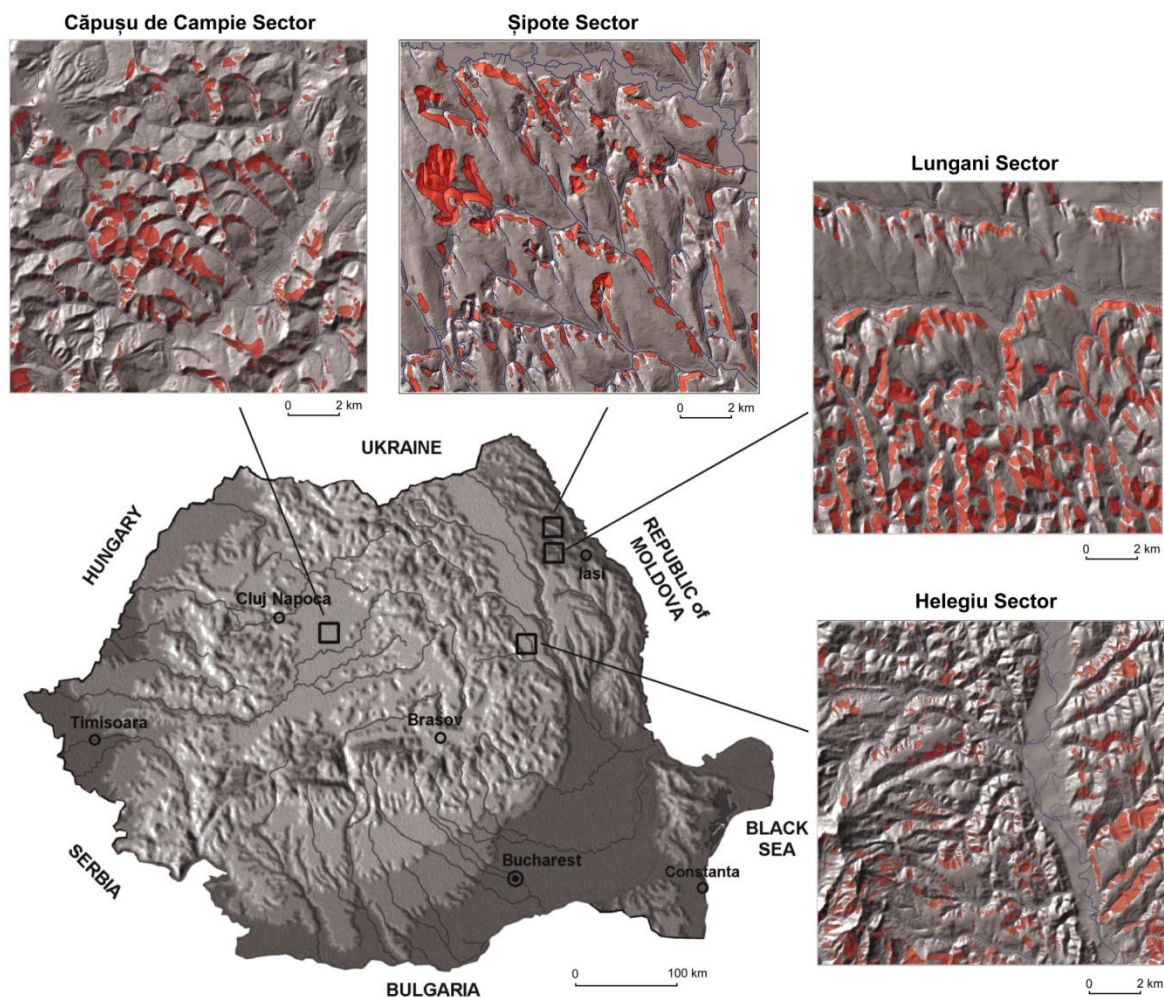

Fig. 1. Location of study areas (with landslide distribution, in red, overlaid on terrain hillshade)

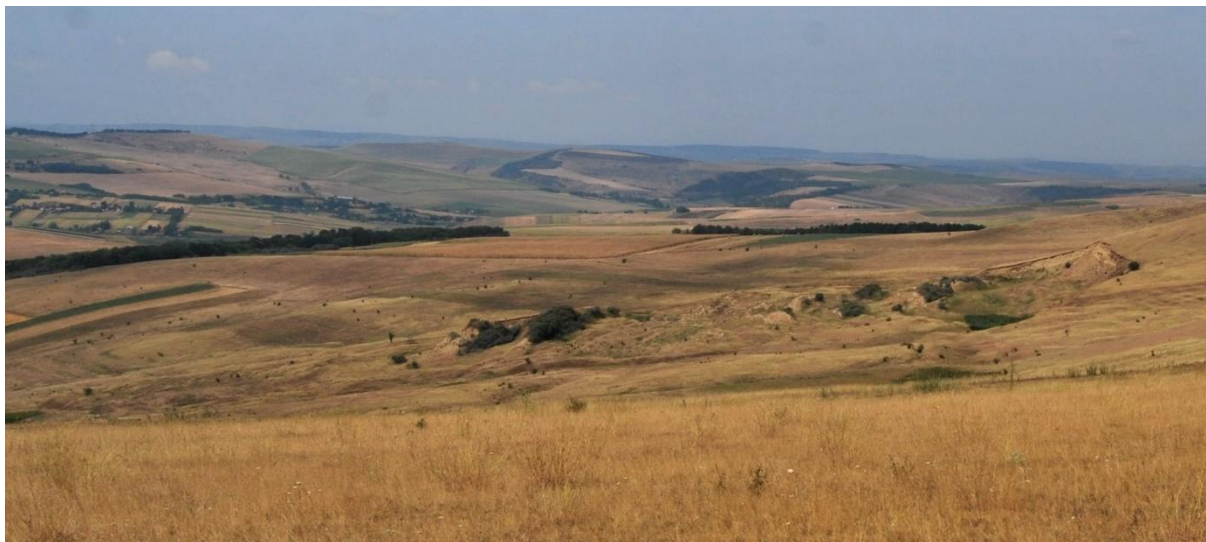

Fig. 2. Deep-seated landslide in Transylvanian Plateau, locally named *glimee* (Căpușu de Câmpie sector)

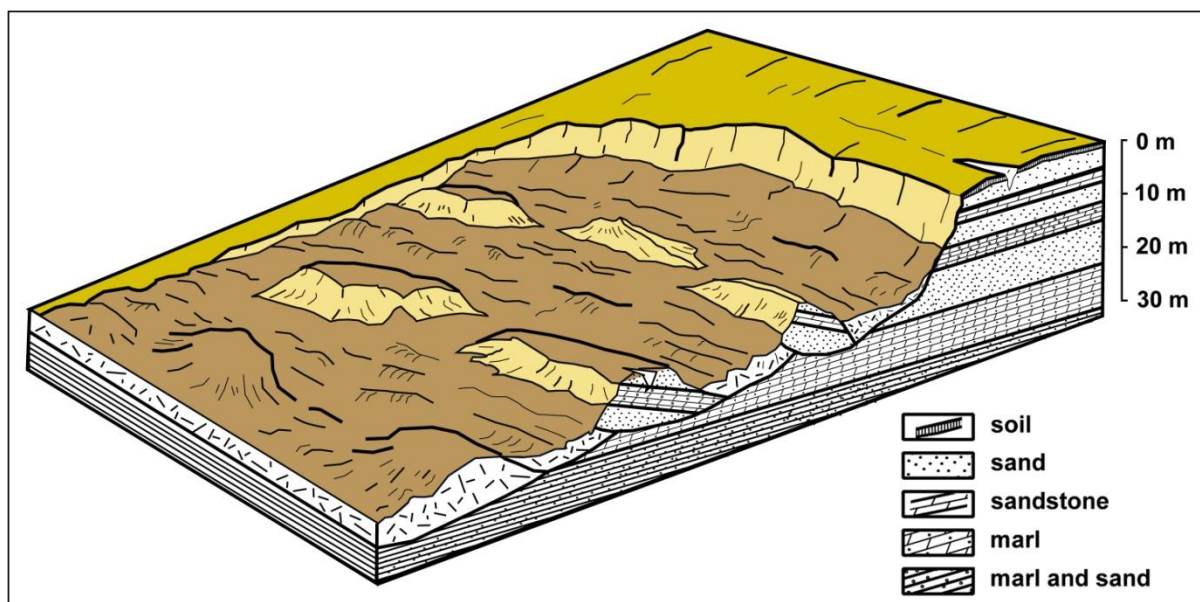

Fig. 3. Block diagram representing the deep seated landslide from Fig. 2.

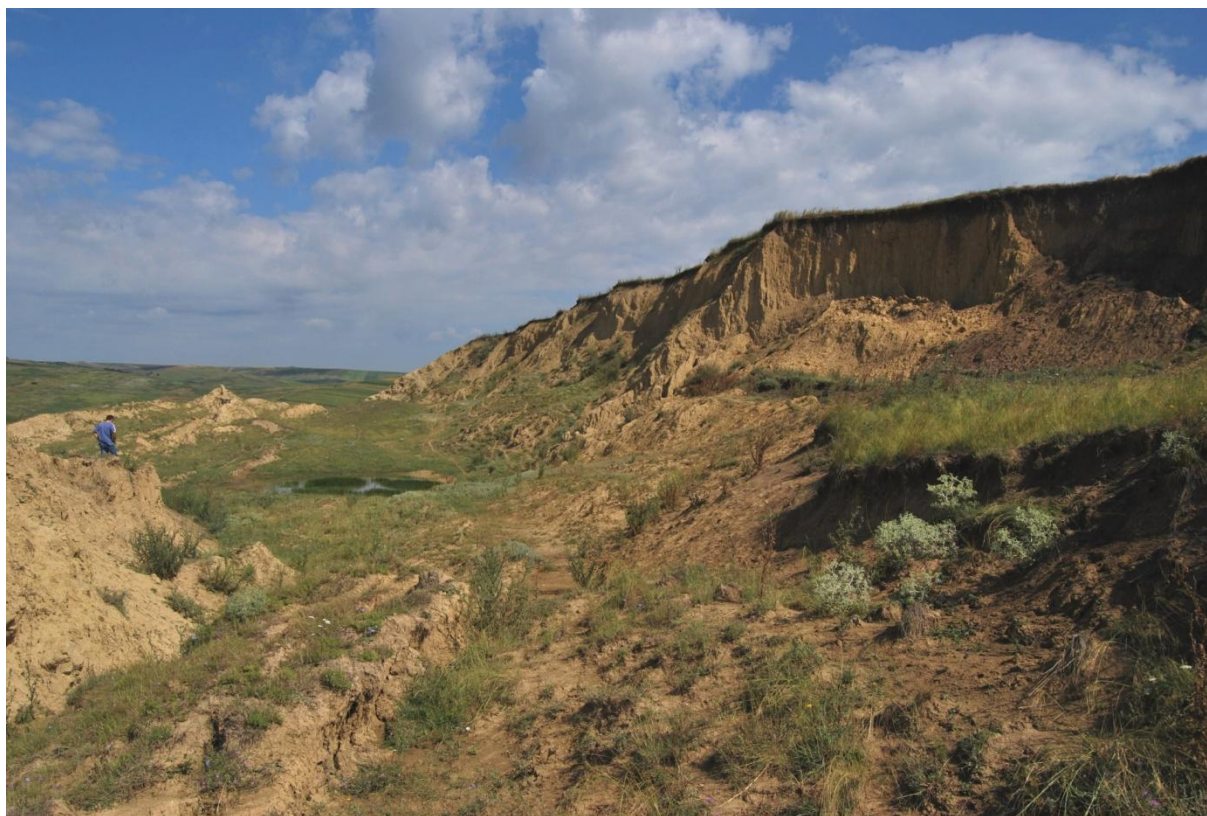

Fig. 4. Deep seated landslide in Moldavian Plateau (Șipote sector)

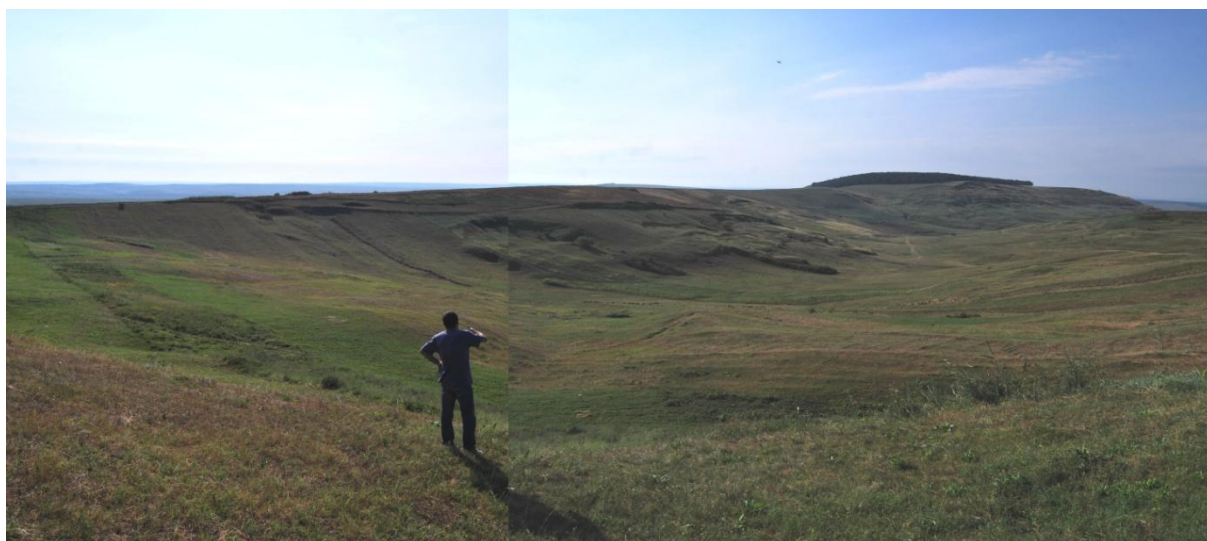

Fig. 5. Semicircular depression shaped by complex geomorphological processes (*hârtop* in Moldavian Plateau, Șipote sector)

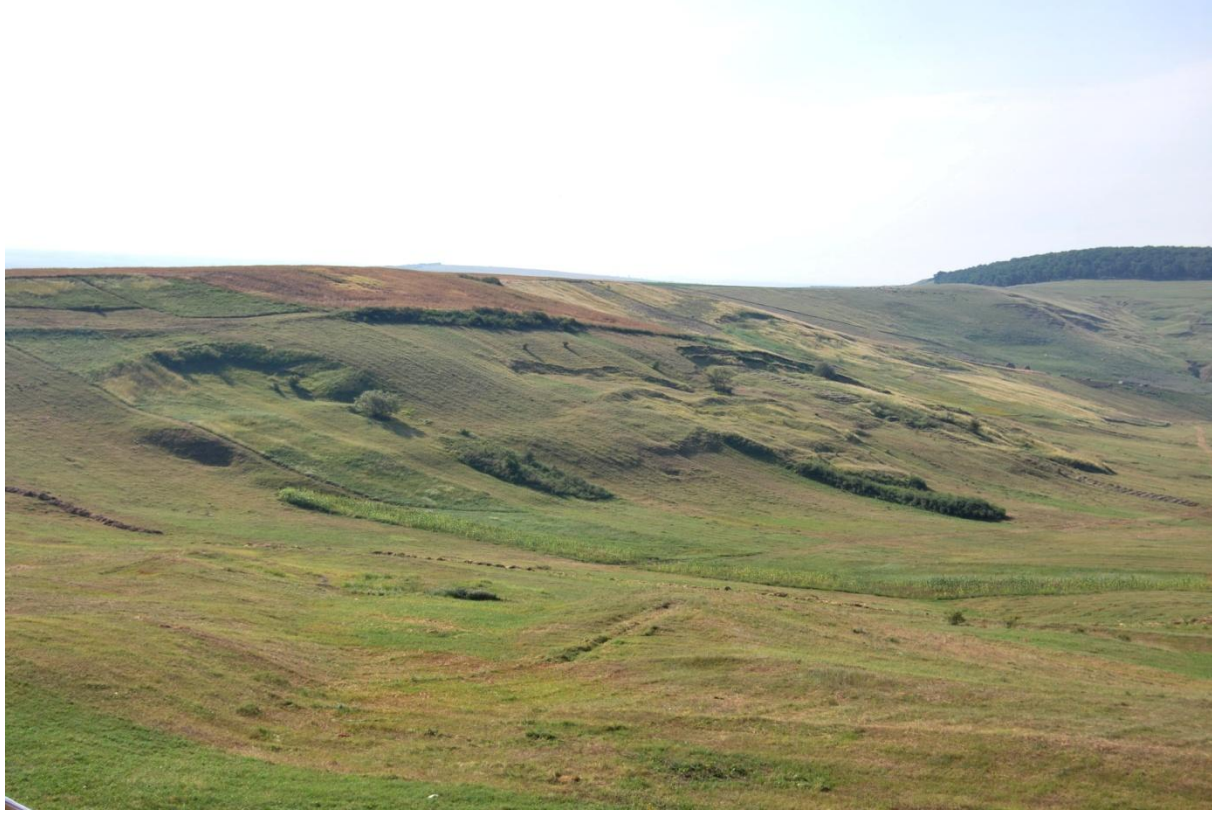

Fig. 6. Shallow landslide in Şipote sector, detail from Fig 5

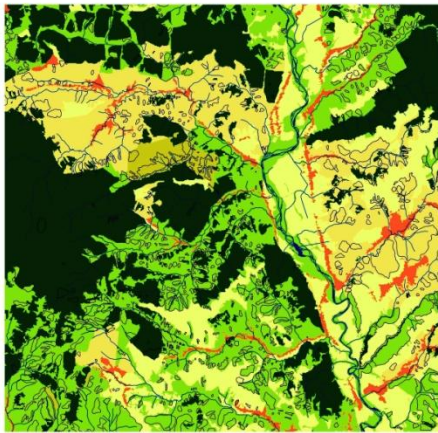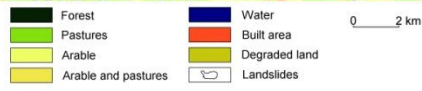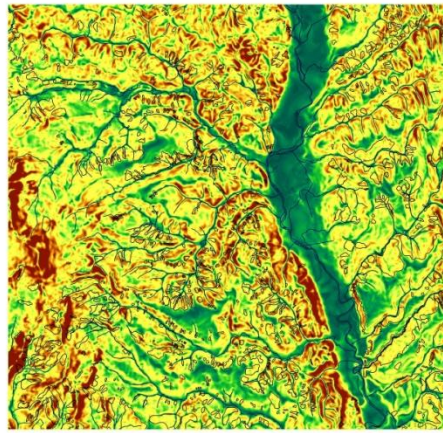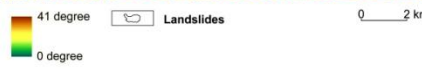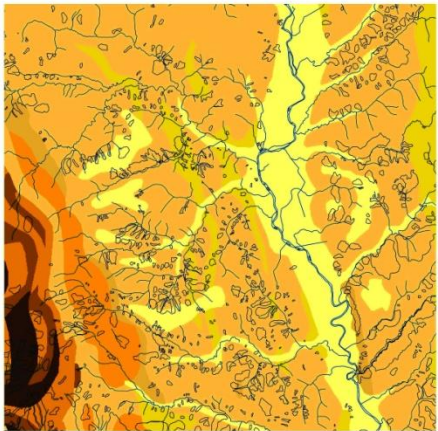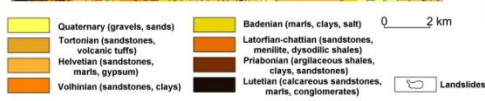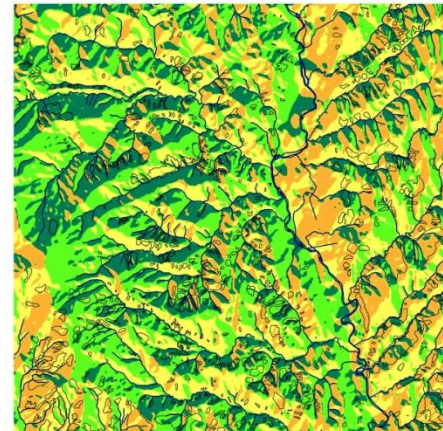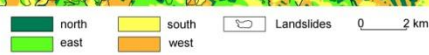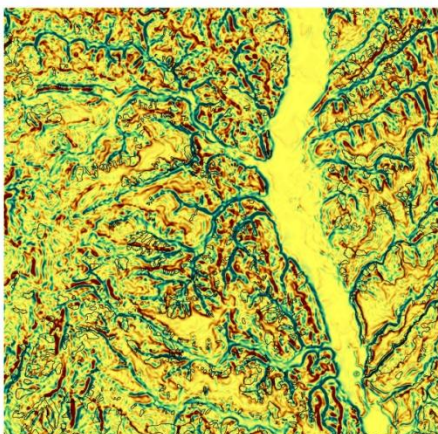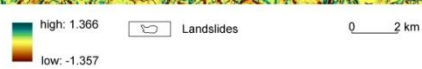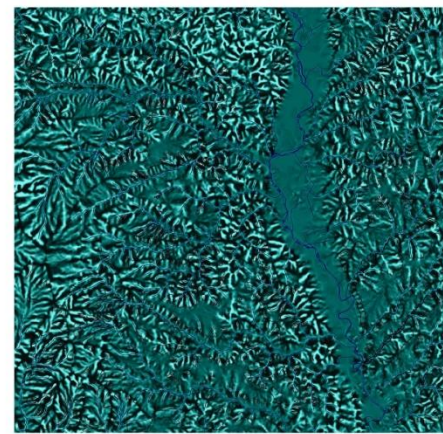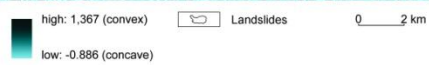

Fig. 7. Significant predictors for Helegiu sector: a - land use; b – slope angle; c – lithology; d – slope aspect; e – profile curvature; f – plan curvature

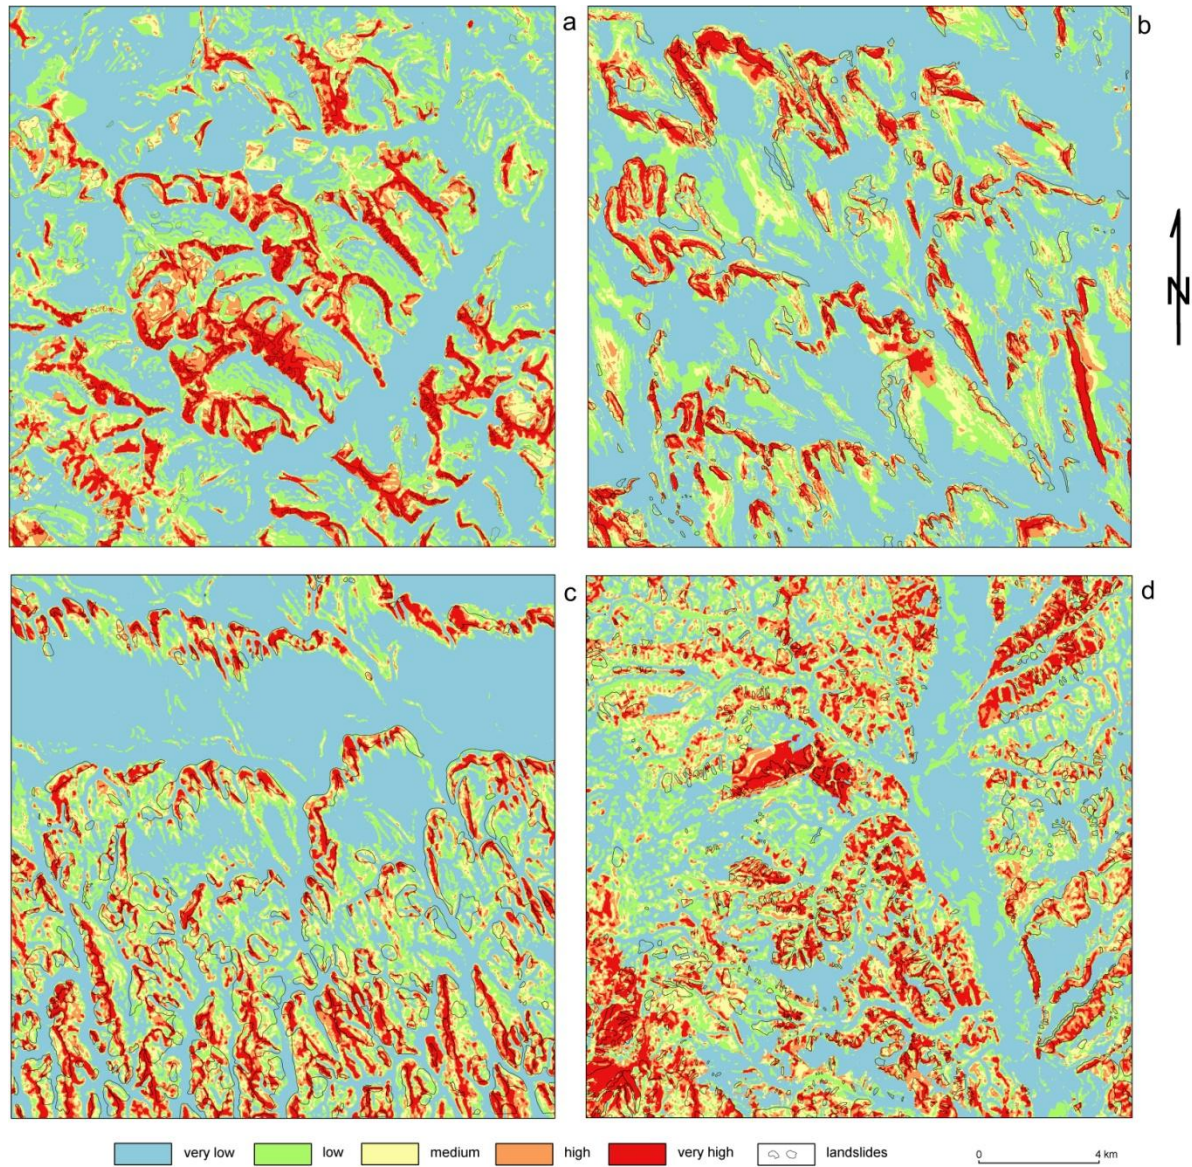

Fig. 8. Classified landslide susceptibility maps: a - Căpușu de Câmpie sector; b - Șipote sector; c - Lungani sector; d - Helegiu sector

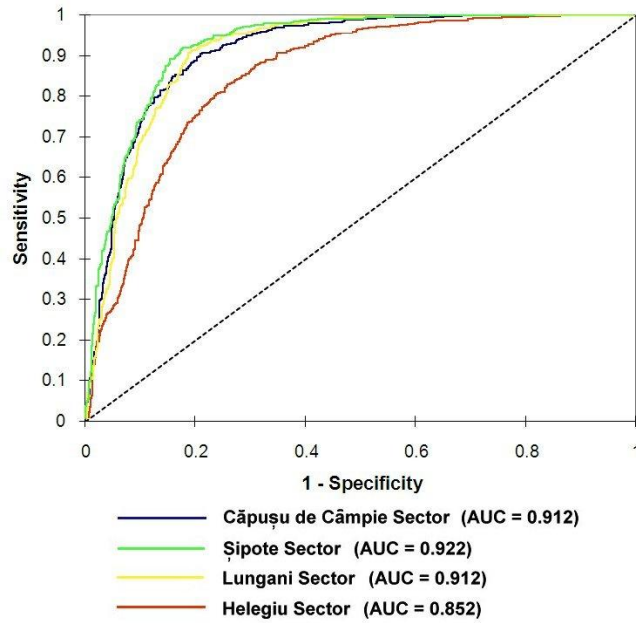

Fig. 9. ROC curves with associated AUC values computed from training samples

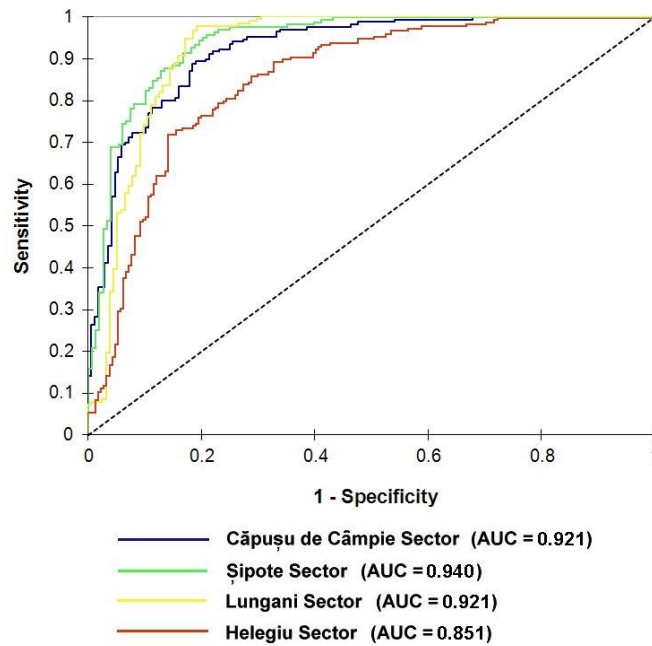

Fig. 10. ROC curves with associated AUC values computed from validation samples

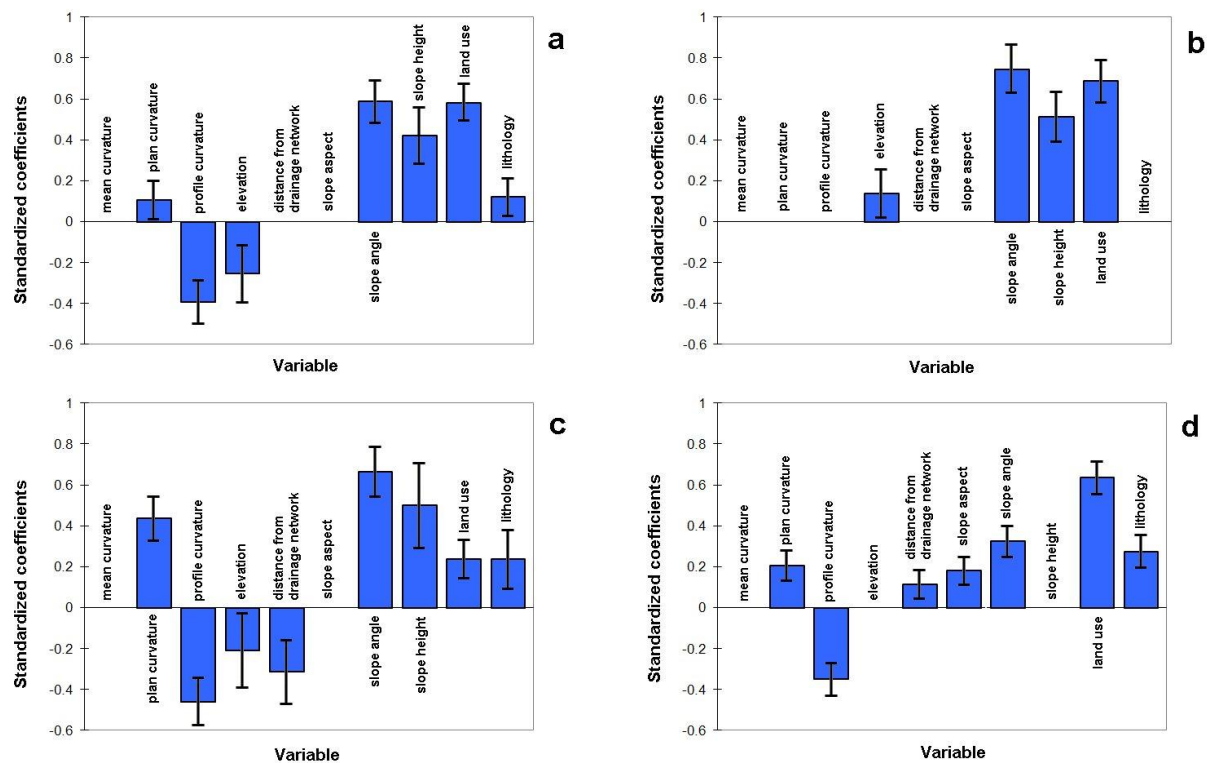

Fig. 11. Standardized coefficients' values of predictors (with bars showing 95% confidence interval): a - Căpușu de Câmpie sector; b - Șipote sector; c – Lungani sector; d - Helegiu sector
